# Supplementary material for: Operator independent reliability of direct augmented reality navigated pedicle screw placement and rod bending
Source: PubMed Central journal article supplement — N Am Spine Soc J. 2021 Oct 8;8:100084. doi: 10.1016/j.xnsj.2021.100084 (PMC8819958; doi:10.1016/j.xnsj.2021.100084), 2021-10-08
Supplement: mmc1.pdf [file mmc1.pdf]

# THE SPINE JOURNAL

A Multidisciplinary Journal of Spinal Disorders  
*Official Journal of the North American Spine Society*

## FDA APPROVAL STATUS

Article Title:

Manuscript reference #:

### FDA Approval Status

If a device or drug requiring FDA approval is identified as an important component of your article, you must indicate the FDA status for use as it will be discussed. Please list the name of the device(s) and drug(s) requiring FDA approval and check the appropriate status for use as it is discussed in the article.

My manuscript does not discuss any drugs or devices requiring FDA approval.

1. Device/Drug

Not Applicable  Not approved for this indication  Approved  Investigational

2. Device/Drug

Not Applicable  Not approved for this indication  Approved  Investigational

3. Device/Drug

Not Applicable  Not approved for this indication  Approved  Investigational

4. Device/Drug

Not Applicable  Not approved for this indication  Approved  Investigational

5. Device/Drug

Not Applicable  Not approved for this indication  Approved  Investigational

Corresponding Author Name:

Date:
